# Supplementary material
Source: PubMed Central journal article supplement (PMC5123754)

## Microvasculature of Obese individuals (BMI >33)

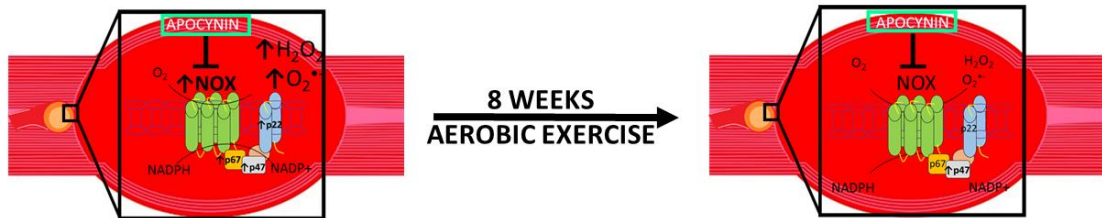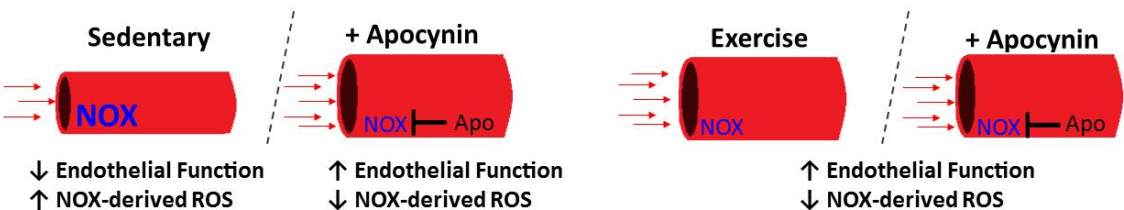

Supplement: NIHMS821800-supplement-GRAPHIC_ABSTRACT.pdf [file NIHMS821800-supplement-GRAPHIC_ABSTRACT.pdf]
